# Supplementary material for: Development of hydrophilic magnetic molecularly imprinted polymers by directly coating onto Fe3O4 with a water-miscible functional monomer and application in a solid-phase extraction procedure for iridoid glycosides
Source: Royal Society of Chemistry journal article supplement (doi:10.1039/c6ra06935e), 2016-01-01
Supplement: c6ra06935e1.pdf [file c6ra06935e1.pdf]

**Supporting information**

**Development of hydrophilic magnetic molecularly imprinted  
polymers by directly coating onto Fe<sub>3</sub>O<sub>4</sub> with a water-miscible functional  
monomer and application in a solid-phase extraction procedure for iridoid  
glycosides**

Wenhua Ji <sup>a, 1</sup>, Mingming Zhang <sup>b, 1</sup>, Wei Liu <sup>a</sup>, Xingmin Wang <sup>a</sup>, Wenjuan Duan <sup>a</sup>,  
Hongkai Xie <sup>a</sup>, Xiao Wang <sup>a, b, \*</sup>

<sup>a</sup> Shandong Key Laboratory of TCM Quality Control Technology, Shandong Analysis  
and Test Center, Shandong Academy of Sciences, 19 Keyuan Street, Jinan 250014,  
China

<sup>b</sup> School of Life Sciences, Shandong Normal University, 88 Wenhua East Road, Jinan,  
250014, China

<sup>1</sup> These authors have equal contribution to this work. Both persons are the first authors.

### **Synthesis of alkenyl glycosides glucose (AGG, functional monomer)**

Acetyl chloride (11.77 g, 150 mmol) was added to allyl alcohol (102.48 g, 1.76 mol) at -5 °C. After stirring for 1 h at -5 °C, D-(+)-glucose (10.00 g, 55.6 mmol) was added and the reaction mixture was stirred for 2 h at 90 °C. The mixture was quenched with NaHCO<sub>3</sub>, filtered and co-concentrated with toluene. The residue was purified by column chromatography on silica gel (ethyl acetate/methanol, 8:1) to afford alkenyl glycosides glucose as a colourless solid. Yield: 3.32 g (15.1 mmol, 55 %). Rf-value: 0.34 (ethyl acetate/methanol, 8:1). <sup>1</sup>H NMR (D<sub>2</sub>O, 400 MHz) δ 5.82-5.90 (m, 1H), 5.26 (d, 1H, J = 17.2 Hz), 5.15 (d, 1H, J = 10.4 Hz), 4.85 (d, 1H, J = 3.6 Hz), 4.09-4.15 (m, 1H), 3.93-3.98 (m, 1H), 3.71-3.81 (m, 1H), 3.61-3.66 (m, 2H), 3.44 (dd, 1H, J = 9.8 and 3.6 Hz), 3.26-3.36 (m, 1H) ppm; <sup>13</sup>C NMR (DMSO-*d*<sub>6</sub>, 100 MHz) δ 135.4, 116.8, 98.3, 73.9, 72.4, 70.8, 69.2, 67.5, 61.5 ppm; ESI-MS *m/z* (%) = 243 (100) [M+Na<sup>+</sup>].

### **Measurement of the static water contact angles**

Polymers were dispersed ultrasonically in DMF (10 mg mL<sup>-1</sup>) and the films were carried out by casting the suspension solutions onto the glass surfaces. The resulting films were dried at 25 °C for 12 h after the solvent was evaporated. The static water contact angles were determined by using an OCA40 video optical contact angle equipment (Dataphysics, Germany).

### **Dispersion stability of polymers in pure water**

The dispersion properties of polymers in pure water were studied. After their ultrasonic dispersion in pure water (1.0 mg mL<sup>-1</sup>), the dispersed mixture were allowed to settle down for different times at 25 °C. Fig. 2C and Fig. S1 showed the typical photographs of the resultant solutions, from which it can be seen clearly that there was much faster sedimentation for MMIPs/DVB and R-MMIPs in comparison with MMIPs/MBA, MMIPs/EGDMA, and MMIPs/NOBE.

### Selectivity study

The partition coefficient ( $K$ ) is calculated as:

$$K = Q_e / C_e \quad (1)$$

For comparison of the selectivity of MMIPs, the selectivity coefficient  $k^{sel}$  and relative selectivity coefficient  $k^{rel}$  values were calculated according to the following formulas:

$$\text{selectivity coefficient: } k^{sel} = K_{GPS} / K_{interfering\ substances} \quad (2)$$

$$\text{relative selectivity coefficient: } k^{rel} = k^{sel}_{MMIPs} / k^{sel}_{NNIPs} \quad (3)$$

**Table S1.** Effect of the mole ratio of template: functional monomer: cross-linker <sup>a</sup> in imprinted process (n=3, RSD < 5%) and the contact angle of polymers.

| Entry |                       | cross-linker | Molar ratio | Q <sub>e</sub><br>(mmol g <sup>-1</sup> ) | α    | contact angle |
|-------|-----------------------|--------------|-------------|-------------------------------------------|------|---------------|
| 1     | MMIPs-1 <sup>b</sup>  | MBA          | 1:3:6       | 0.091                                     | 2.12 | 18.5±1.5      |
| 2     | MNIPs-1 <sup>b</sup>  | MBA          | 1:3:6       | 0.043                                     |      | 17.2±2.1      |
| 3     | MMIPs-2 <sup>b</sup>  | MBA          | 1:3:12      | 0.11                                      | 3.51 | 16.4±1.3      |
| 4     | MNIPs-2 <sup>b</sup>  | MBA          | 1:3:12      | 0.031                                     |      | 18.1±1.7      |
| 5     | MMIPs-3 <sup>b</sup>  | MBA          | 1:3:15      | 0.088                                     | 2.36 | 21.5±1.4      |
| 6     | MNIPs-3 <sup>b</sup>  | MBA          | 1:3:15      | 0.037                                     |      | 23.4±1.9      |
| 7     | MMIPs-4 <sup>b</sup>  | EGDMA        | 1:3:6       | 0.092                                     | 2.24 | 21.5±1.7      |
| 8     | MNIPs-4 <sup>b</sup>  | EGDMA        | 1:3:6       | 0.041                                     |      | 23.5±2.2      |
| 9     | MMIPs-5 <sup>b</sup>  | EGDMA        | 1:3:12      | 0.13                                      | 3.42 | 19.4±1.5      |
| 10    | MNIPs-5 <sup>b</sup>  | EGDMA        | 1:3:12      | 0.038                                     |      | 21.1±1.5      |
| 11    | MMIPs-6 <sup>b</sup>  | EGDMA        | 1:3:15      | 0.090                                     | 2.31 | 23.7±2.4      |
| 12    | MNIPs-6 <sup>b</sup>  | EGDMA        | 1:3:15      | 0.039                                     |      | 22.4±1.9      |
| 13    | MMIPs-7 <sup>b</sup>  | NOBE         | 1:3:6       | 0.085                                     | 2.50 | 21.5±1.7      |
| 14    | MNIPs-7 <sup>b</sup>  | NOBE         | 1:3:6       | 0.034                                     |      | 22.3±2.5      |
| 15    | MMIPs-8 <sup>b</sup>  | NOBE         | 1:3:12      | 0.089                                     | 3.37 | 22.1±1.5      |
| 16    | MNIPs-8 <sup>b</sup>  | NOBE         | 1:3:12      | 0.026                                     |      | 23.4±2.3      |
| 17    | MMIPs-9 <sup>b</sup>  | NOBE         | 1:3:15      | 0.082                                     | 2.16 | 23.7±2.4      |
| 18    | MNIPs-9 <sup>b</sup>  | NOBE         | 1:3:15      | 0.038                                     |      | 22.5±1.5      |
| 19    | MMIPs-10 <sup>b</sup> | DVB          | 1:3:6       | 0.065                                     | 1.98 | 138.5±5.5     |
| 20    | MNIPs-10 <sup>b</sup> | DVB          | 1:3:6       | 0.033                                     |      | 127.2±4.1     |
| 21    | MMIPs-11 <sup>b</sup> | DVB          | 1:3:12      | 0.074                                     | 2.74 | 136.4±5.3     |
| 22    | MNIPs-11 <sup>b</sup> | DVB          | 1:3:12      | 0.027                                     |      | 148.1±3.7     |
| 23    | MMIPs-12 <sup>b</sup> | DVB          | 1:3:15      | 0.056                                     | 1.75 | 142.5±4.4     |
| 24    | MNIPs-12 <sup>b</sup> | DVB          | 1:3:15      | 0.032                                     |      | 133.4±3.2     |
| 25    | MMIPs-13 <sup>c</sup> | MBA          | 1:3:6       | 0.044                                     | 1.22 | 130.5±3.5     |

|    |                       |       |        |       |      |           |
|----|-----------------------|-------|--------|-------|------|-----------|
| 26 | MNIPs-13 <sup>c</sup> | MBA   | 1:3:6  | 0.036 |      | 121.2±4.6 |
| 27 | MMIPs-14 <sup>c</sup> | MBA   | 1:3:12 | 0.057 | 1.46 | 146.7±4.7 |
| 28 | MNIPs-14 <sup>c</sup> | MBA   | 1:3:12 | 0.039 |      | 138.1±5.1 |
| 29 | MMIPs-15 <sup>c</sup> | MBA   | 1:3:15 | 0.039 | 1.39 | 132.5±4.7 |
| 30 | MNIPs-15 <sup>c</sup> | MBA   | 1:3:15 | 0.028 |      | 143.4±3.9 |
| 31 | MMIPs-16 <sup>d</sup> | MBA   | 1:0:12 | 0.014 | -    | 124.1±3.1 |
| 32 | MMIPs-17 <sup>d</sup> | EGDMA | 1:0:12 | 0.017 | -    | 142.7±4.1 |
| 33 | MMIPs-18 <sup>d</sup> | NOBE  | 1:0:12 | 0.021 | -    | 135.6±3.4 |

<sup>a</sup> GPS was used as the template and the molar ratio of GPS to Fe<sub>3</sub>O<sub>4</sub> was 2:1.

<sup>b</sup> AGG was used as the functional monomer.

<sup>c</sup> The reference magnetic molecularly imprinted polymers (R-MMIPs). MAA was used as the functional monomer.

<sup>d</sup> The blank magnetic molecularly imprinted polymers (B-MMIPs). No functional monomers were used.

**Table S2.** Distribution ratio ( $K$ ), selectivity coefficient ( $k^{sel}$ ) and relative selectivity coefficient ( $k^{rel}$ ) values of MMIPs-2 and MNIPs-2 for different analytes.

| Analytes | $K_{NIPs}$<br>(L/g) | $k^{sel}_{NIPs}$ | $K_{MIPs}$<br>(L/g) | $k^{sel}_{MIPs}$ | $k^{rel}_{MIPs}$ |
|----------|---------------------|------------------|---------------------|------------------|------------------|
| GPS      | 0.12                | -                | 0.94                | -                | -                |
| GDS      | 0.12                | 1.00             | 1.20                | 0.78             | 0.78             |
| GPA      | 0.13                | 0.92             | 0.75                | 1.25             | 1.36             |
| SAM      | 0.12                | 1.00             | 0.75                | 1.25             | 1.25             |
| GGB      | 0.14                | 0.86             | 0.59                | 1.59             | 1.85             |
| LOG      | 0.13                | 0.92             | 0.70                | 1.34             | 1.46             |
| MOS      | 0.16                | 0.75             | 0.84                | 1.12             | 1.49             |
| SOL      | 0.14                | 0.86             | 0.54                | 1.74             | 2.02             |
| ARB      | 0.18                | 0.67             | 0.24                | 3.91             | 5.84             |
| GEP      | 0.20                | 0.60             | 0.28                | 3.24             | 5.40             |

**Table S3.** Distribution ratio ( $K$ ), selectivity coefficient ( $k^{sel}$ ) and relative selectivity coefficient ( $k^{rel}$ ) values of MMIPs-14 and MNIPs-14 for different analytes.

| Analytes | $K_{NIPs}$<br>(L/g) | $k^{sel}_{NIPs}$ | $K_{MIPs}$<br>(L/g) | $k^{sel}_{MIPs}$ | $k^{rel}_{MIPs}$ |
|----------|---------------------|------------------|---------------------|------------------|------------------|
| GPS      | 0.16                | -                | 0.27                | -                | -                |
| GDS      | 0.15                | 1.07             | 0.26                | 1.03             | 0.96             |
| GPA      | 0.17                | 0.94             | 0.24                | 1.12             | 1.19             |
| SAM      | 0.18                | 0.89             | 0.21                | 1.28             | 1.43             |
| GGB      | 0.13                | 1.23             | 0.16                | 1.68             | 1.36             |
| LOG      | 0.16                | 1.00             | 0.24                | 1.12             | 1.12             |
| MOS      | 0.14                | 1.14             | 0.21                | 1.28             | 1.12             |
| SOL      | 0.16                | 1.00             | 0.22                | 1.23             | 1.23             |
| ARB      | 0.13                | 1.23             | 0.18                | 1.50             | 1.22             |
| GEP      | 0.16                | 1.00             | 0.19                | 1.42             | 1.42             |

**Table S4.** The lifetime of polymers ( $Q_e$ , mmol g<sup>-1</sup>, RSD < 5.0%, n = 3).

| Polymers             | 2 <sup>d</sup> |      | 4 <sup>d</sup> |      | 6 <sup>d</sup> |      | 8 <sup>d</sup> |      | 10 <sup>d</sup> |      |
|----------------------|----------------|------|----------------|------|----------------|------|----------------|------|-----------------|------|
|                      | $Q_e$          | IF   | $Q_e$          | IF   | $Q_e$          | IF   | $Q_e$          | IF   | $Q_e$           | IF   |
| MMIPs-2 <sup>a</sup> | 0.13           |      | 0.12           |      | 0.12           |      | 0.11           |      | 0.092           |      |
|                      |                | 3.42 |                | 3.33 |                | 3.24 |                | 3.14 |                 | 2.88 |
| MNIPs-2 <sup>a</sup> | 0.038          |      | 0.036          |      | 0.037          |      | 0.035          |      | 0.032           |      |
| MMIPs-2 <sup>b</sup> | 0.12           |      | 0.12           |      | 0.11           |      | 0.11           |      | 0.094           |      |
|                      |                | 3.64 |                | 3.43 |                | 3.06 |                | 3.44 |                 | 3.03 |
| MNIPs-2 <sup>b</sup> | 0.033          |      | 0.035          |      | 0.036          |      | 0.032          |      | 0.031           |      |
| MMIPs-2 <sup>c</sup> | 0.14           |      | 0.12           |      | 0.12           |      | 0.11           |      | 0.095           |      |
|                      |                | 3.78 |                | 3.16 |                | 3.08 |                | 3.33 |                 | 3.17 |
| MNIPs-2 <sup>c</sup> | 0.037          |      | 0.038          |      | 0.039          |      | 0.033          |      | 0.030           |      |

<sup>a</sup> Polymers were damaged at 100 °C for 12 h, then the adsorption capacity of MMIPs to GDS was investigated.

<sup>b</sup> Polymers were soaked with 30% hydrochloric acid for 12 h, then the adsorption capacity of MMIPs to GDS was investigated.

<sup>c</sup> Polymers were soaked with 20% NaOH solution for 12 h, then the adsorption capacity of MMIPs to GDS was investigated.

<sup>d</sup> Adsorption–desorption cycles of polymers.

**Table S5.** Comparison of the proposed method with reported approaches for the extraction and detection of IGs.

| Analytical system | Matrix                   | Analytes                                     | LOD<br>( $\mu\text{g mL}^{-1}$ ) | Adsorbent/Extractant | References |
|-------------------|--------------------------|----------------------------------------------|----------------------------------|----------------------|------------|
| HPLC–ESI/MS       | Lonicera flower          | LOG, MOS, SOL, et al                         | 0.004–0.019                      | Direct injection     | 22         |
| HPLC              | Gentiana Fruits          | Sweroside, swertiamarin, and gentiopicroside | 0.12–0.52                        | Direct injection     | 23         |
| HPLC–MS/MS        | Longdan Xiegan Decoction | GPS, GGB, swertiamarin, and gentiopicroside  | 0.007–0.013                      | Direct injection     | 24         |
| HPLC              | Gardenia Fruits          | GPS, GDS, GPA, GGB, SZM                      | 0.17–0.39                        | -                    | 25         |
| HPTLC–MS          | Gardenia Fruits          | GPS, GDS, GGB                                | -                                | HPTLC silica gel     | 27         |
| MMSPE–HPLC        | Zhizi Jinhua Pills       | GPS, GDS, GPA, GGB, SZM, LOG, MOS, SOL       | 0.007–0.01                       | MMIP                 | This work  |

**Table S6.** Concentration (mg/g, RSD < 4.5%, n = 3) of IGs in *ZJP* products. *ZJP* were purchased from *Tongrentang* pharmacy co., Ltd., Beijing (TRT, Batch No. 4082322 and 4093411), *Huanrun san-jiu* pharmaceutical co., Ltd., Zaozhuang (999, Batch No. 1408171 and 141108), and *Kong Shengtang* pharmaceutical co., Ltd., Zoucheng (KST, Batch No. 1509402), respectively.

| Samples     | GDS                     | GPS                     | GPA                   | SAM                     | GGB                     | LOG                     | MOS                   | SOL                     |
|-------------|-------------------------|-------------------------|-----------------------|-------------------------|-------------------------|-------------------------|-----------------------|-------------------------|
| TRT-4082322 | 2.81(1.21) <sup>a</sup> | 7.51(3.21) <sup>a</sup> | 0.121(0) <sup>a</sup> | 4.21(1.01) <sup>a</sup> | 3.87(0.81) <sup>a</sup> | 3.35(1.32) <sup>a</sup> | 0.102(0) <sup>a</sup> | 3.13(1.02) <sup>a</sup> |
| TRT-4093411 | 2.94(1.05) <sup>a</sup> | 7.64(2.81) <sup>a</sup> | 0.134(0) <sup>a</sup> | 4.43(1.12) <sup>a</sup> | 3.65(0.89) <sup>a</sup> | 3.24(1.25) <sup>a</sup> | 0.112(0) <sup>a</sup> | 3.91(1.04) <sup>a</sup> |
| 999-1408171 | 2.92(1.13) <sup>a</sup> | 7.44(3.01) <sup>a</sup> | 0.153(0) <sup>a</sup> | 4.65(1.22) <sup>a</sup> | 3.12(0.72) <sup>a</sup> | 3.14(1.12) <sup>a</sup> | 0.114(0) <sup>a</sup> | 3.22(1.13) <sup>a</sup> |
| 999-141108  | 2.88(1.16) <sup>a</sup> | 7.32(2.71) <sup>a</sup> | 0.157(0) <sup>a</sup> | 4.77(1.09) <sup>a</sup> | 3.44(0.85) <sup>a</sup> | 3.17(1.25) <sup>a</sup> | 0.127(0) <sup>a</sup> | 3.94(1.41) <sup>a</sup> |
| KST-1509402 | 2.84(1.01) <sup>a</sup> | 6.91(2.26) <sup>a</sup> | 0.187(0) <sup>a</sup> | 3.91(1.06) <sup>a</sup> | 3.01(0.91) <sup>a</sup> | 3.23(1.13) <sup>a</sup> | 0.117(0) <sup>a</sup> | 3.71(1.21) <sup>a</sup> |

<sup>a</sup> Values in parentheses are the concentration of IGs in *ZJP* products when SampliQ

C18 SPE column was used as the pre-treatment.

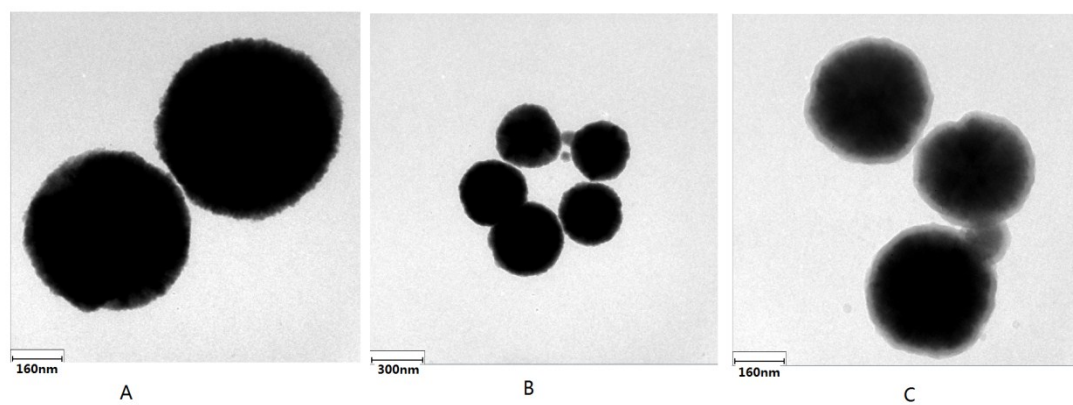

Fig. S1 The effect of the polymerization time on the shell thickness. (A) 3 h, (B) 6 h and (C) 9 h.

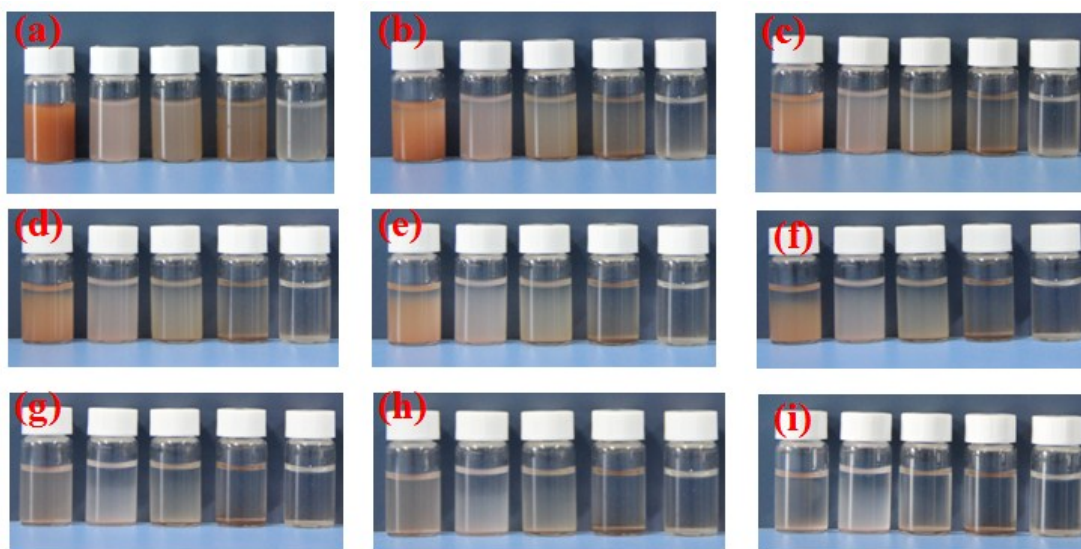

**Fig. S2** The detailed photographs for the dispersion stability of polymers in water ( $1.0 \text{ mg mL}^{-1}$ ) at  $25^\circ\text{C}$  after their ultrasonically dispersed solutions being settled down for 0 (a), 0.5 (b), 1.0 (c), 1.5 (d), 2.0 (e), 3.0 (f), 4.0 (g), 5.0 (h), and 6 h (i), respectively. The samples located from left to right in each photograph are MMIPs-2, MMIPs-5, MMIPs-8, MMIPs-11, and MMIPs-14.

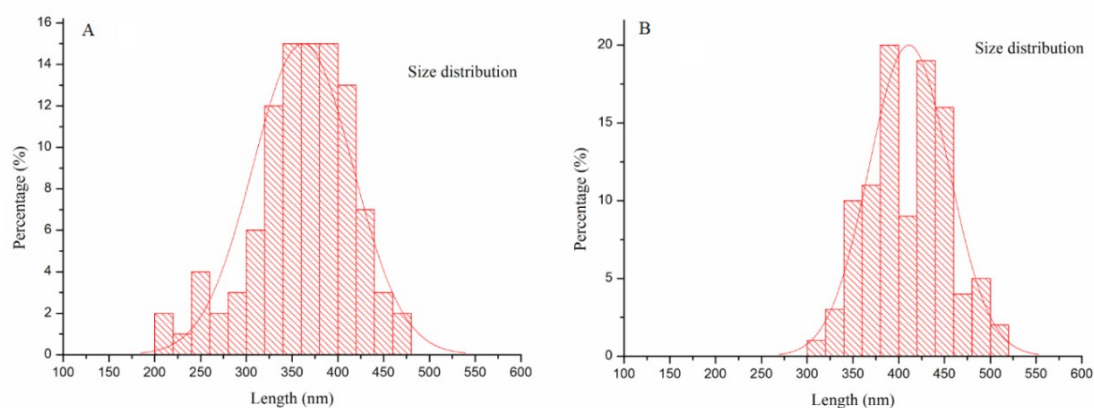

**Fig. S3.** Size distribution of Fe<sub>3</sub>O<sub>4</sub> (A) and MMIPs-2 (B). The particle diameter dispersity of polymers was calculated from the SEM data measuring the size of, at least, 100 particles.

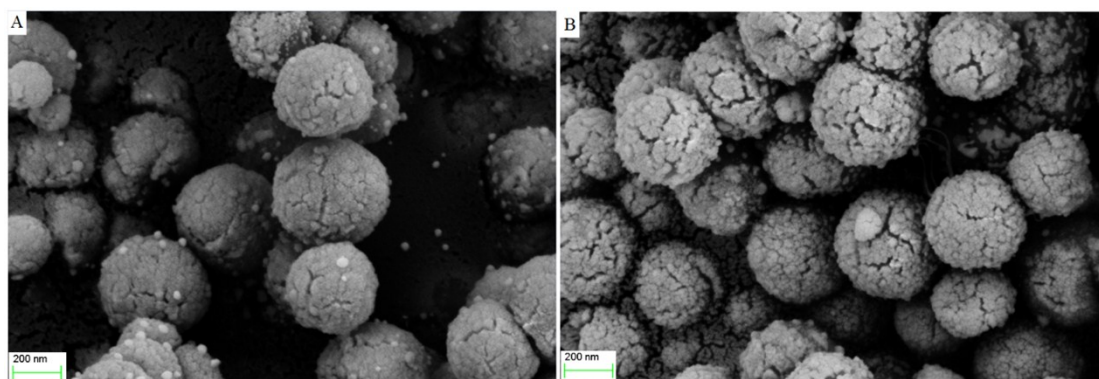

**Fig. S4.** SEM images of MMIPs-2 (A) and MMIPs-2 damaged at 100 °C for 12 h (B).

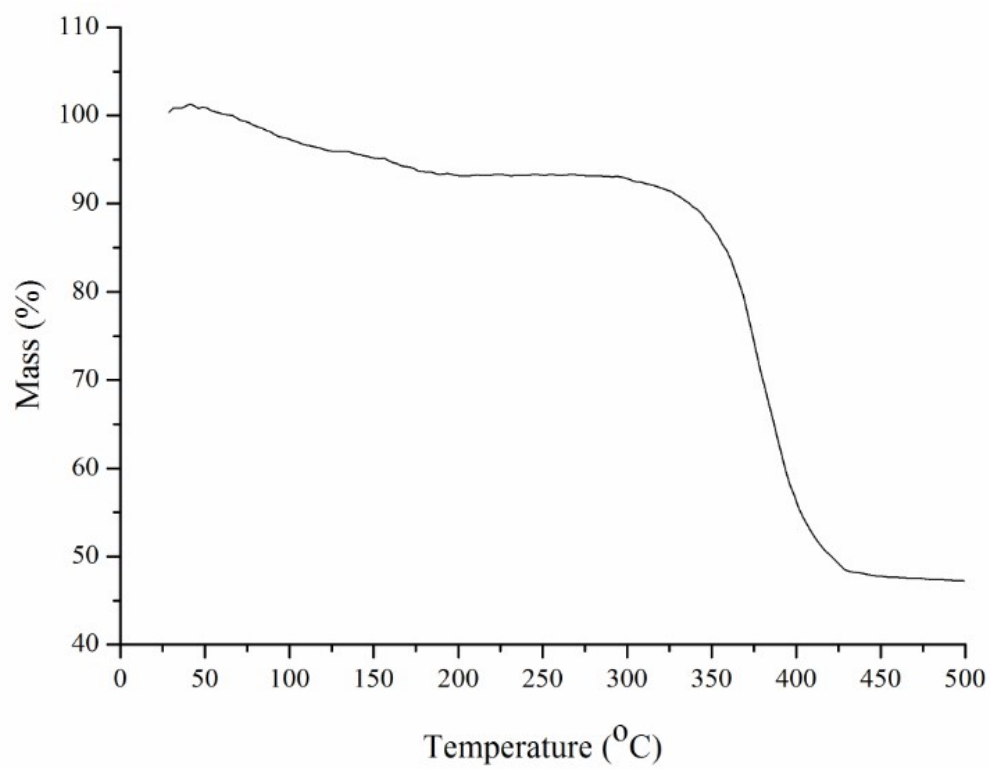

Fig. S5 The thermogravimetric analysis of MMIPs layer.

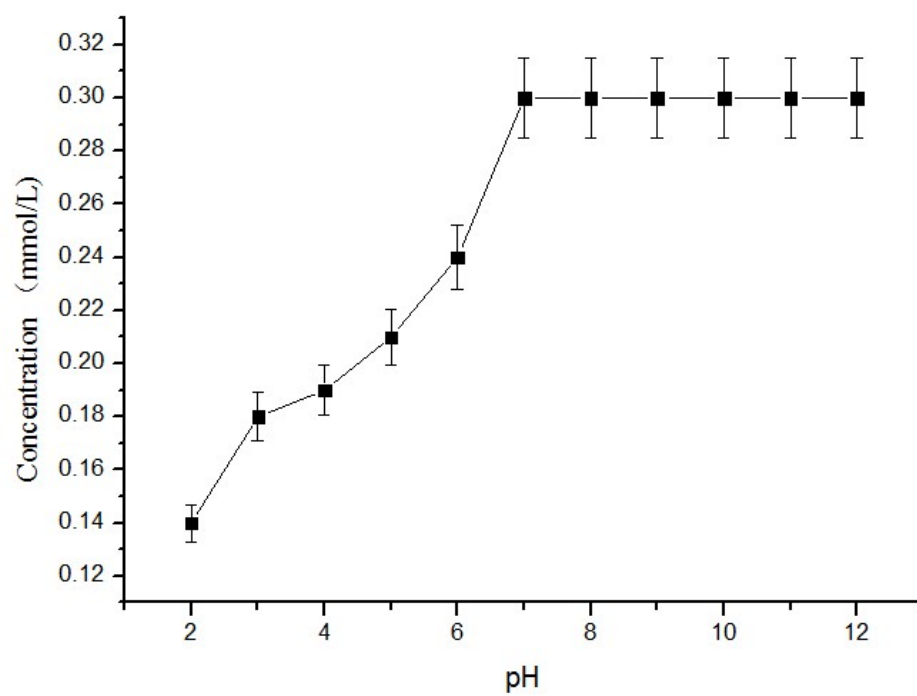

**Fig. S6** Effect of pH on the stability of eight IGs without adding MMIPs. Error bars represent one standard deviation for three measurements.

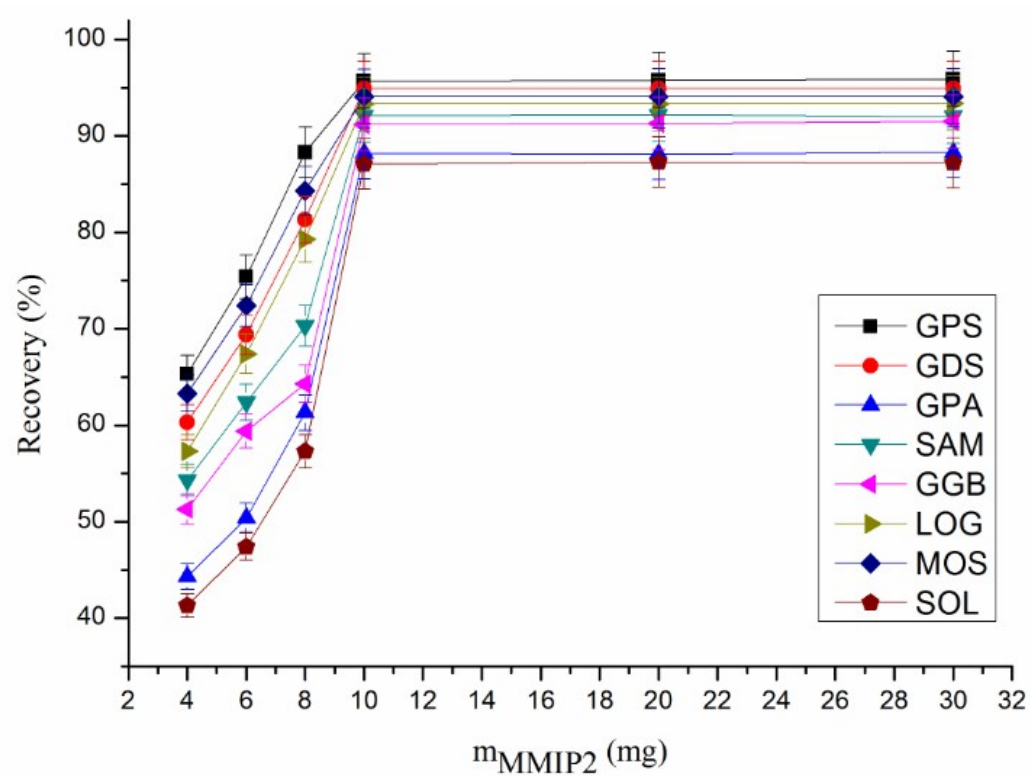

**Fig. S7** Effect of MMIPs-2 usage amount on IGs recoveries. Error bars represent one standard deviation for three measurements.

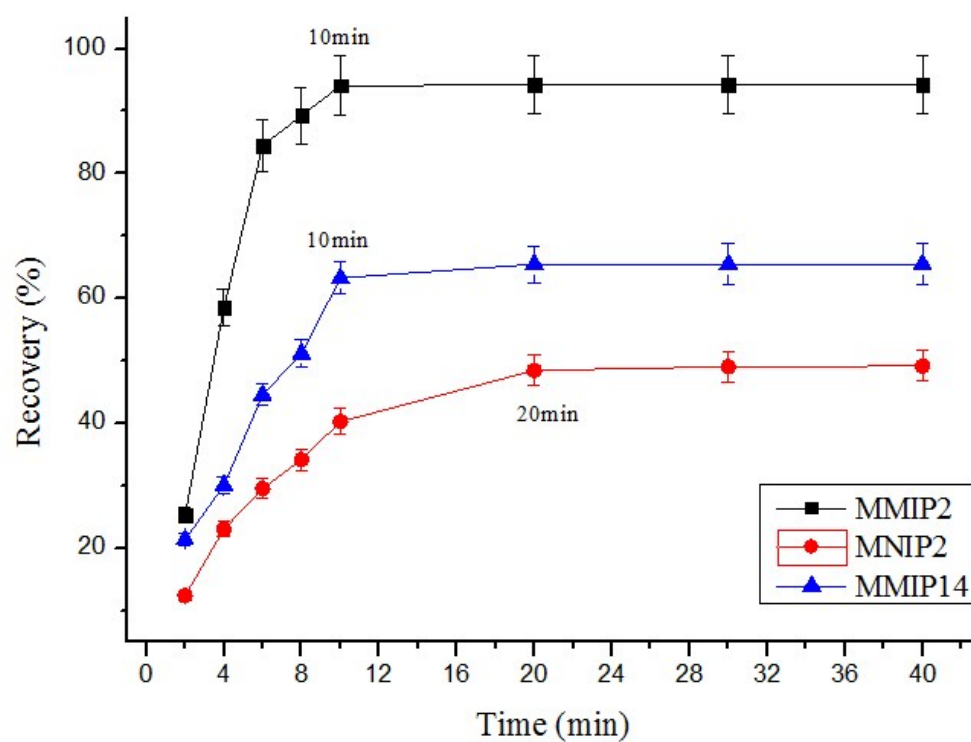

**Fig. S8** Extraction time on MMIPs-2, MNIPs-2, and MMIPs-14. Error bars represent one standard deviation for three measurements.

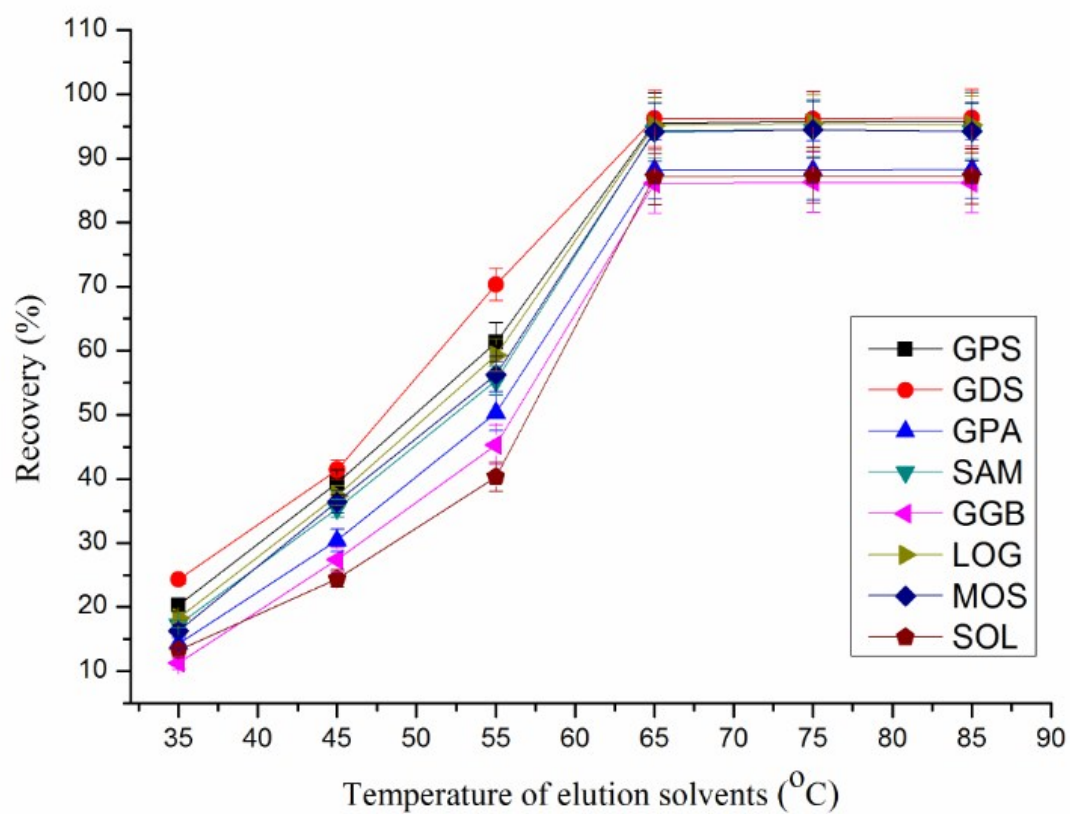

**Fig. S9** Effect of different elution solvents on IGs recoveries for MMIPs-2. Error bars represent one standard deviation for three measurements.
